# Supplementary material for: Tailoring mechanical response through coronal layer overlap in tethered micelle hydrogel networks
Source: Royal Society of Chemistry journal article supplement (doi:10.1039/c5sm00122f), 2015-01-01
Supplement: c5sm00122f1.pdf [file c5sm00122f1.pdf]

## Tailoring Mechanical Properties through Coronal Layer Overlap in Tethered Micelle Hydrogel Networks

Chen Guo<sup>a</sup> and Travis S. Bailey<sup>a,b</sup>

### Supporting Information

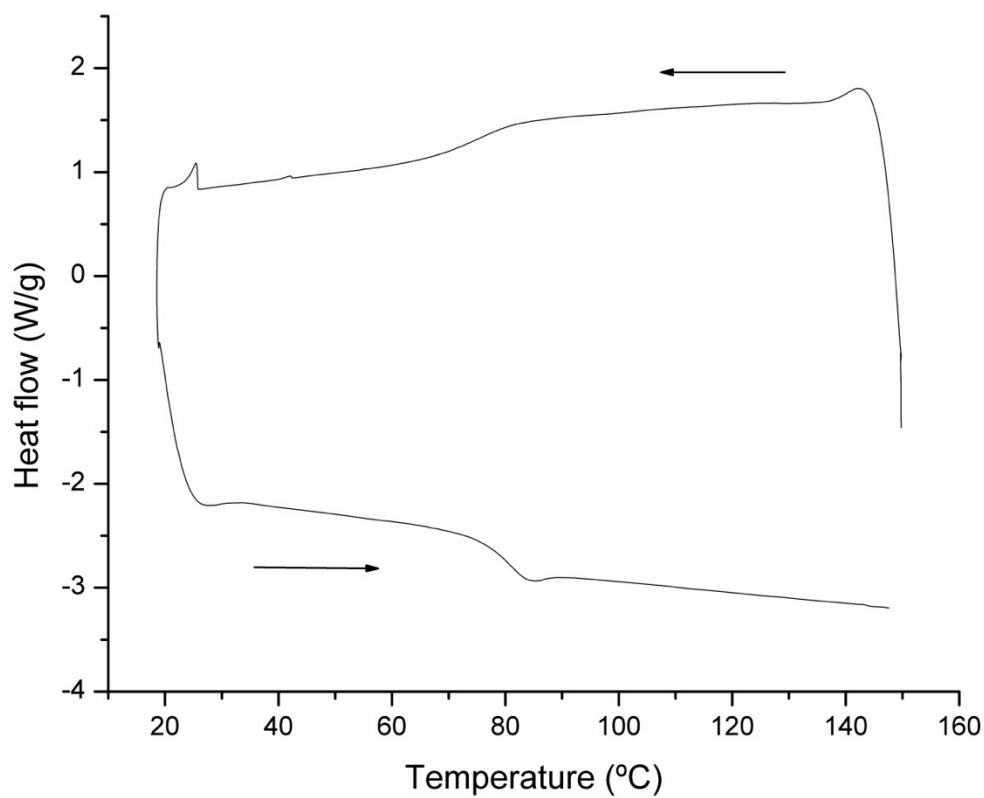

Figure S1. DSC of polystyrene homopolymer (S-OH) with molecular weight of 8390 g mol<sup>-1</sup>.

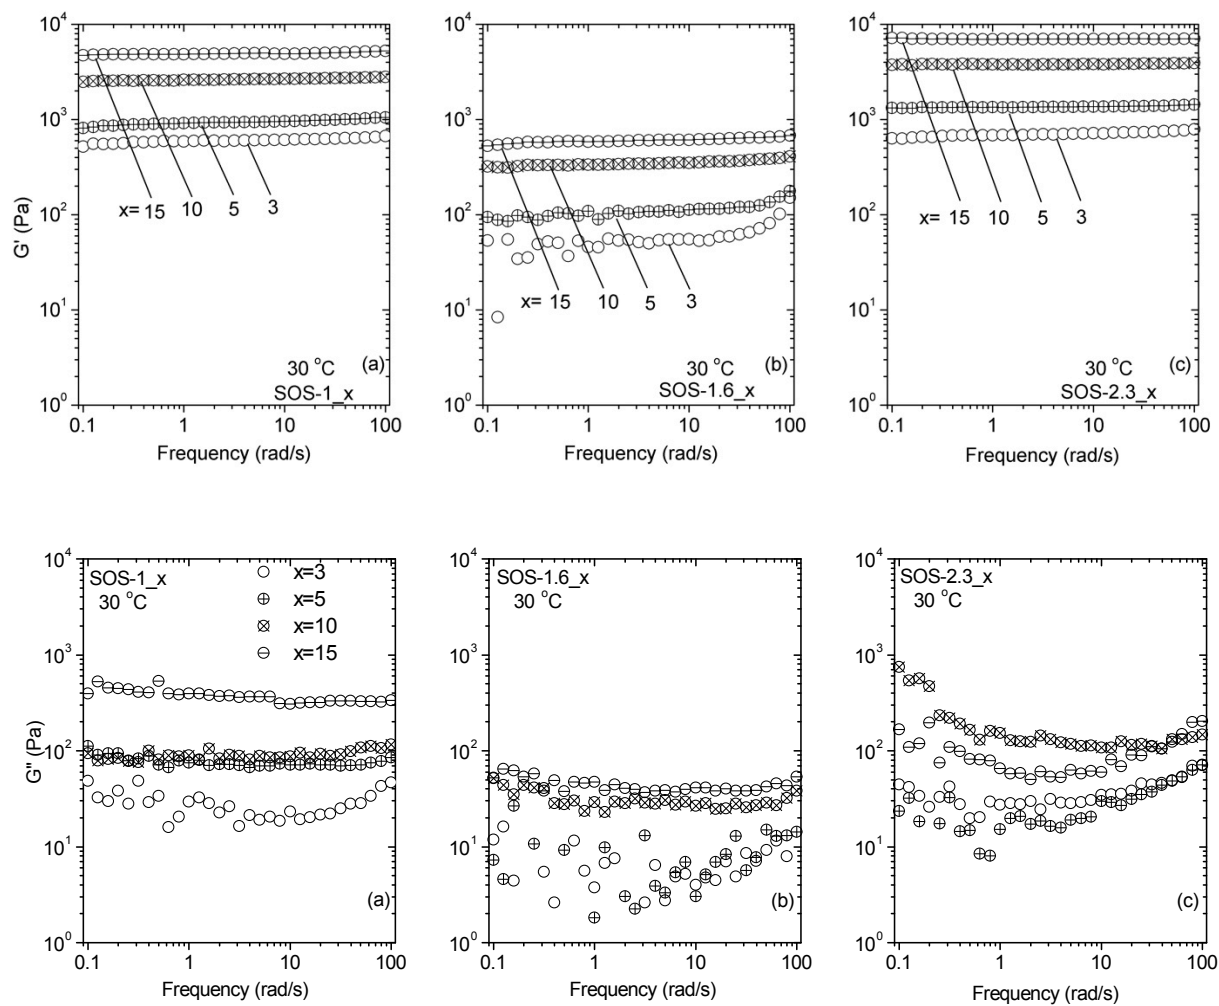

Figure S2. Expanded version of Figure 6 in the main text. Complete dynamic frequency sweeps comparing both  $G'$  and  $G''$  for hydrogels based on combinations of SO-1 with (a) SOS-1, (b) SOS-1.6, and (c) SOS-2.3 at 30 °C. "x" denotes the mol% SOS-Y triblock copolymer in the network.

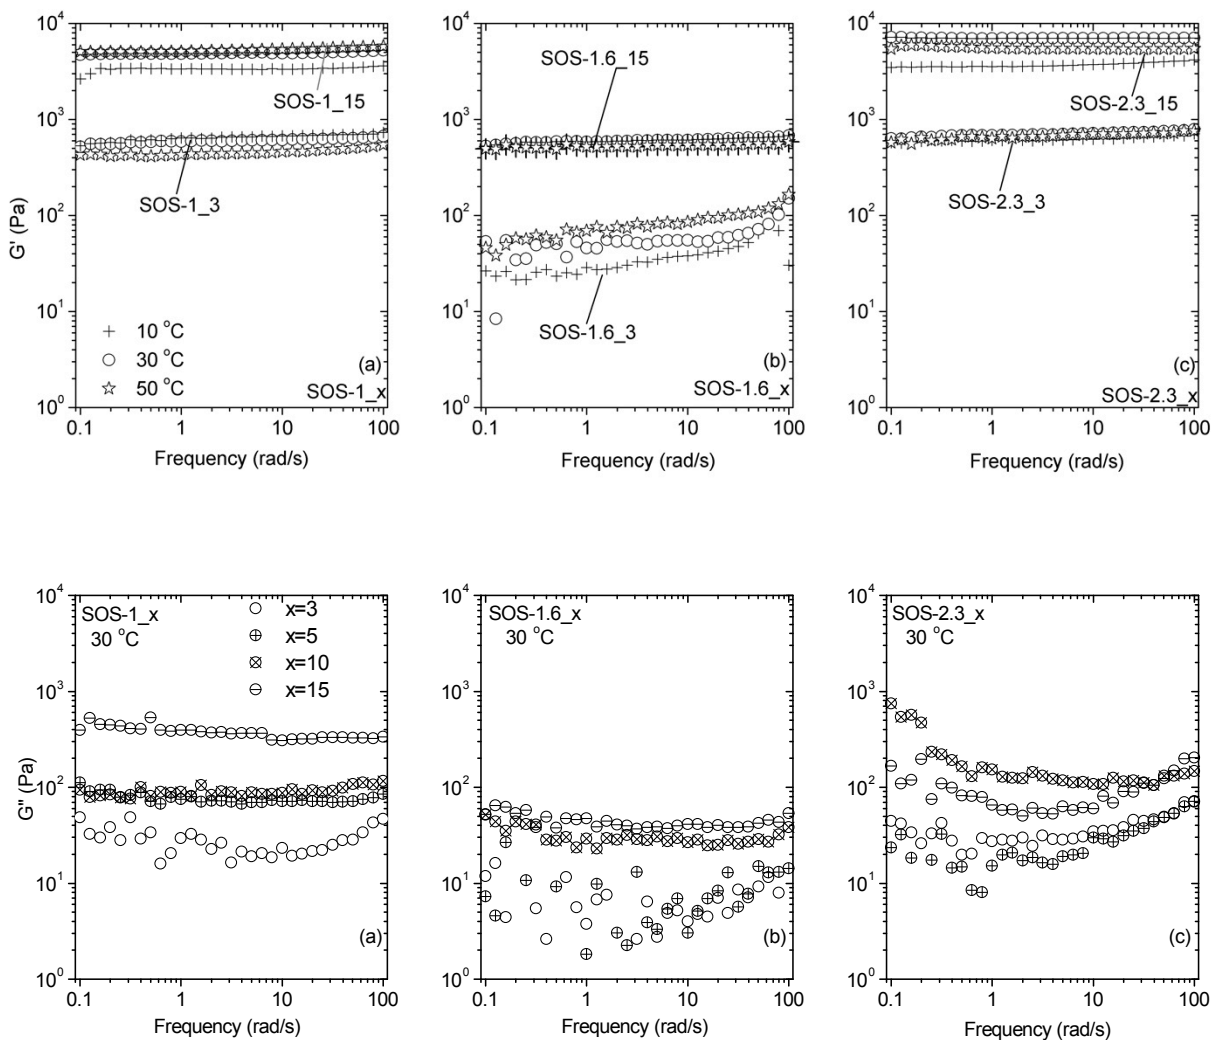

Figure S3. Expanded version of Figure 7 in the main text. Complete dynamic frequency sweeps comparing both  $G'$  and  $G''$  for hydrogels based on combinations of SO-1 with (a) SOS-1, (b) SOS-1.6, and (c) SOS-2.3 at 10, 30, and 50 °C. Data only for hydrogels containing 3 mol% and 15 mol% SOS-Y triblock copolymer in the network are shown.
